# Supplementary material for: Targeted Lipidomics of Mitochondria in a Cellular Alzheimer’s Disease Model
Source: MDPI journal article supplement (doi:10.3390/biomedicines9081062), 2021-08-21
Supplement: s1 [file s1]

## Supplementary Materials

### Targeted lipidomics of mitochondria in a cellular Alzheimer's disease model

Irina Kurokin <sup>1,†</sup>, Anna A. Lauer <sup>1,†</sup>, Daniel Janitschke <sup>1,†</sup>, Jakob Winkler <sup>1</sup>, Elena L. Theiss <sup>1</sup>, Lea V. Griebisch <sup>1</sup>, Sabrina M. Pilz <sup>1</sup>, Veronika Matschke <sup>2</sup>, Martin van der Laan <sup>3</sup>, Heike S. Grimm <sup>1</sup>, Tobias Hartmann <sup>4</sup> and Marcus O. W. Grimm <sup>1,4\*</sup>

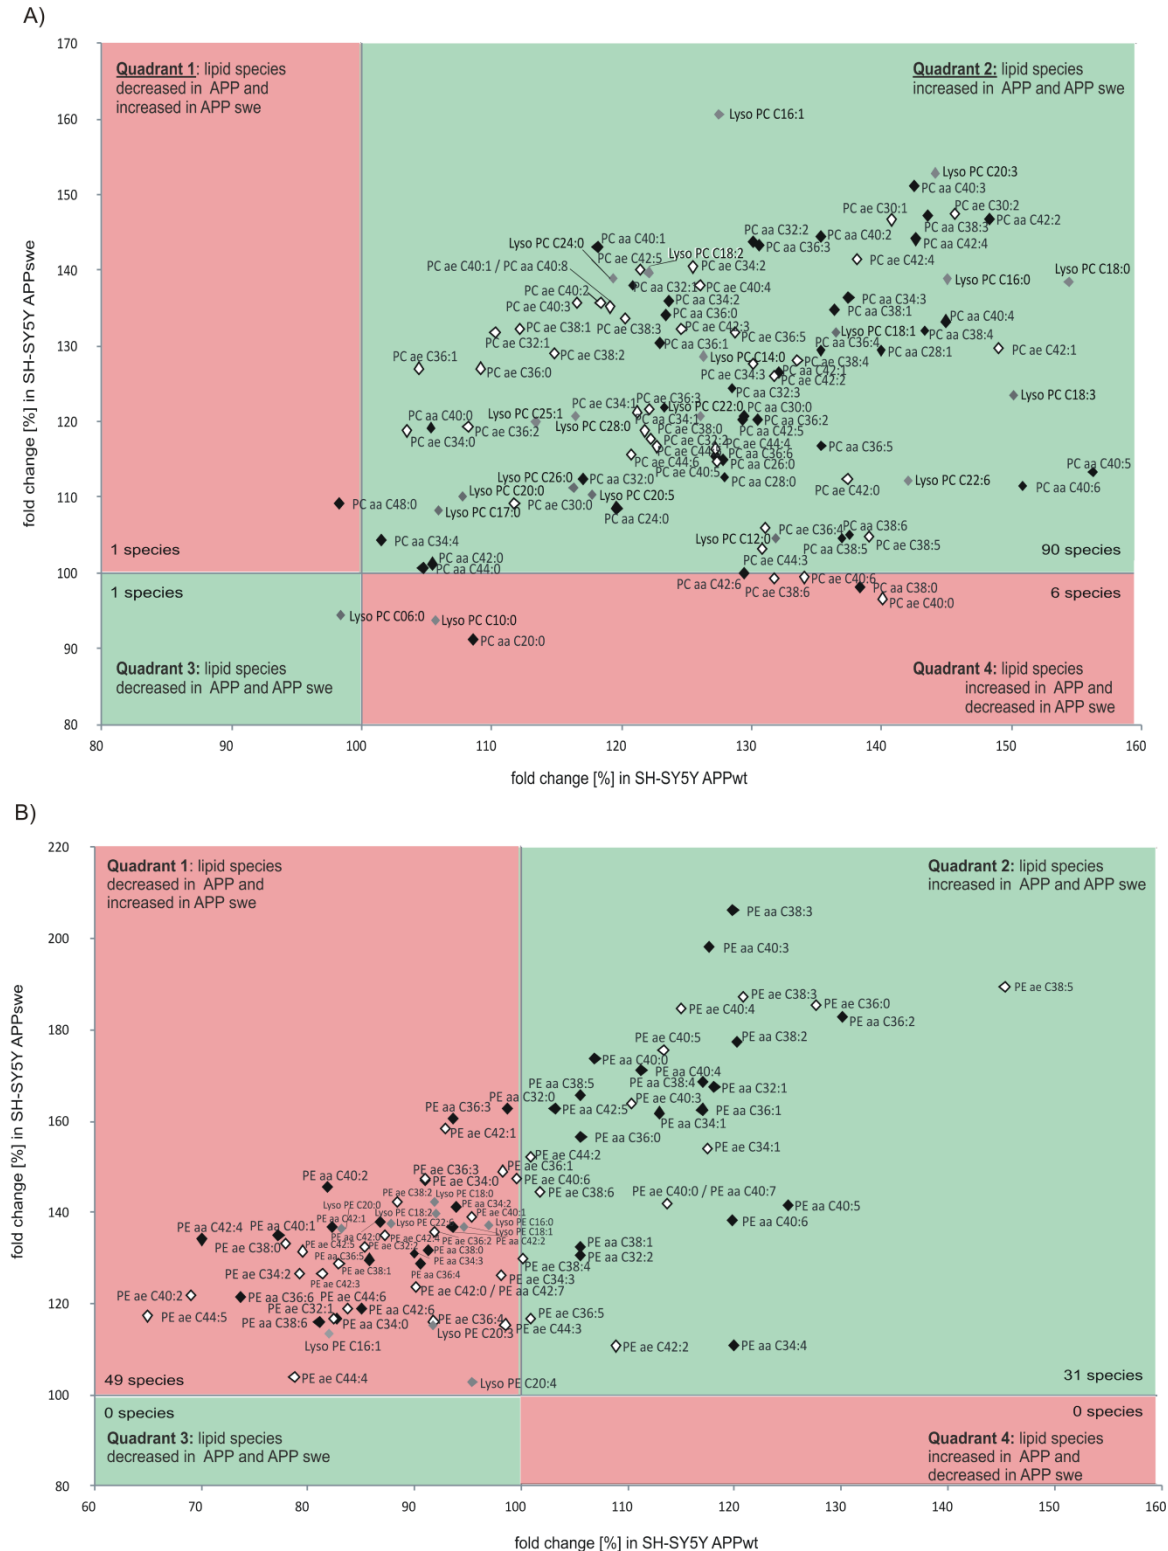

**Supplementary Figure S1: Comparison of lipid changes observed in SH-SY5Y APPswedish cells to SH-SY5Y APPwt overexpressing cells. (A)** Fold changes of all measured PC species (PCaa, PCae and lyso-PC) in SH-SY5Y APPwt cells (abscissa axis) plotted against fold changes of these species in SH-SY5Y APPswedish cells (ordinate

axis). Quadrants two and three (green) represent PC species that are consistently de- or increased in both cell lines while quadrants one and four (red) include those with different effects in the compared neuroblastoma cell lines. **(B)** Fold changes of all measured PE species (PEaa, PEae and lyso-PE) in SH-SY5Y APPwt cells (abscissa axis) plotted against fold changes of these species in SH-SY5Y APPswedish cells (ordinate axis). Quadrants two and three (green) represent PC species that are consistently de- or increased in both cell lines while quadrants one and four (red) include those with different effects in the compared neuroblastoma cell lines.

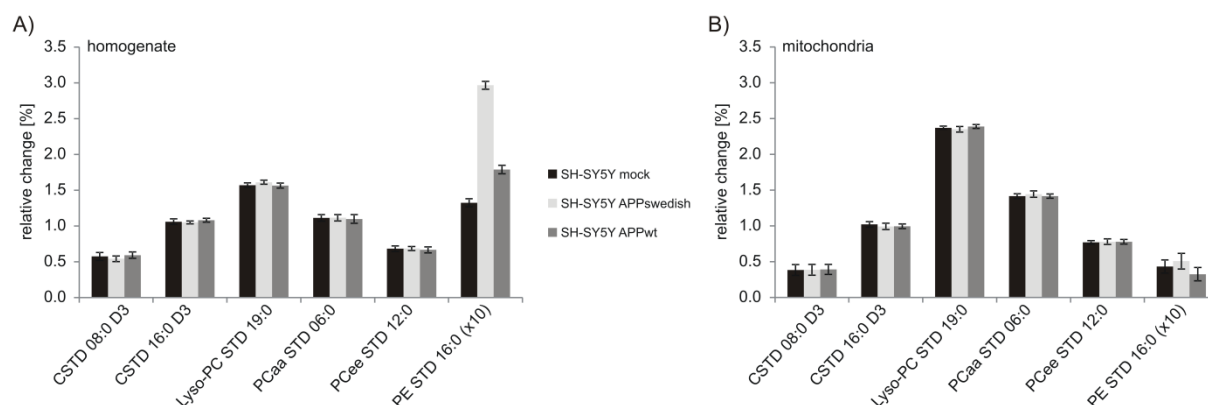

**Supplementary Figure S2: Matrix effects.** Calculated matrix effects of the measured parameters carnitine, lyso-phosphatidylcholines (lyso-PC), phosphatidylcholines (PCaa), phosphatidylcholines plasmalogens (PCae) and phosphatidylethanolamines (PE) in homogenates (A) and mitochondria (B).

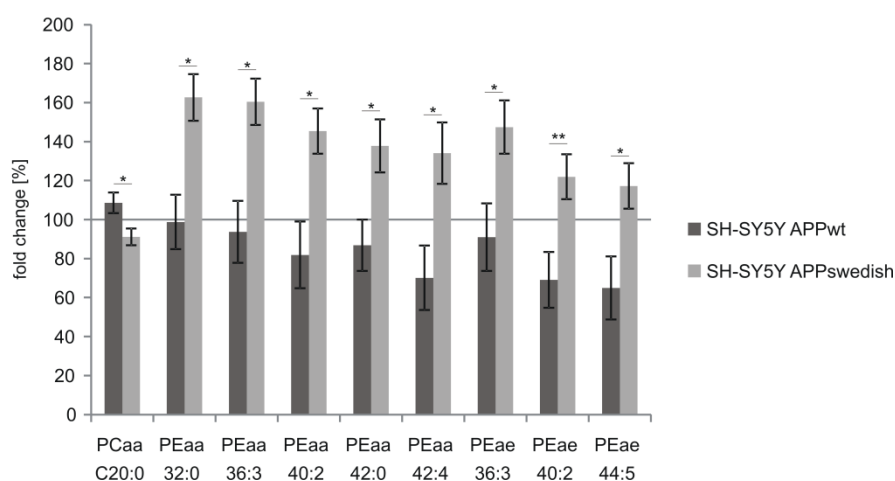

**Supplementary Figure S3: Alterations in lipid homeostasis in mitochondrial fractions of SH-SY5Y APPwt cells compared to cells overexpressing APPswedish.** Significant differences in PEaa and PEae species are shown as bar charts. Error bars represent the standard error of the mean (SEM). Statistical significance was calculated using two-tailed student's t-test with \*  $p \leq 0.05$  and \*\*  $p \leq 0.01$ .

A)

| Lipid | mitochondria |       |       |       | homogenate |       |       |       |
|-------|--------------|-------|-------|-------|------------|-------|-------|-------|
|       | PC aa        | PC ae | PE aa | PE ae | PC aa      | PC ae | PE aa | PE ae |
| C32:1 | 137.9        | 131.9 | 167.4 | 116.6 | 111.3      | 95.5  | 106.5 | 93.8  |
| C32:2 | 143.8        | 117.7 | 130.4 | 132.5 | 115.4      | 95.8  | 114.3 | 103.1 |
| C34:1 | 121.8        | 121.3 | 161.8 | 153.8 | 103.6      | 89.0  | 99.5  | 99.1  |
| C34:2 | 135.9        | 140.5 | 141.2 | 126.7 | 114.4      | 101.9 | 117.4 | 99.2  |
| C34:3 | 136.4        | 127.7 | 131.0 | 126.3 | 120.1      | 99.7  | 110.0 | 98.7  |
| C36:0 | 134.1        | 127.1 | 156.6 | 185.2 | 107.5      | 100.7 | 95.8  | 112.2 |
| C36:1 | 130.4        | 127.1 | 162.5 | 149.0 | 103.6      | 98.1  | 96.8  | 98.0  |
| C36:2 | 120.3        | 119.3 | 182.7 | 135.6 | 102.8      | 91.1  | 111.1 | 101.6 |
| C36:3 | 143.2        | 121.5 | 160.5 | 147.4 | 121.7      | 89.4  | 122.2 | 96.6  |
| C36:4 | 129.4        | 105.9 | 128.8 | 116.1 | 110.3      | 78.6  | 94.5  | 88.1  |
| C36:5 | 116.9        | 131.8 | 129.7 | 116.7 | 109.5      | 99.7  | 92.6  | 85.9  |
| C38:0 | 98.2         | 118.8 | 131.7 | 133.2 | 76.8       | 92.6  | 70.4  | 84.3  |
| C38:1 | 134.8        | 132.2 | 132.3 | 128.6 | 104.7      | 101.5 | 103.5 | 98.3  |
| C38:3 | 147.2        | 133.7 | 206.1 | 187.3 | 123.4      | 96.2  | 122.7 | 99.7  |
| C38:4 | 132.1        | 128.1 | 168.7 | 129.8 | 117.1      | 92.3  | 95.2  | 92.5  |
| C38:5 | 104.6        | 104.7 | 165.6 | 189.4 | 102.3      | 81.0  | 89.9  | 76.2  |
| C38:6 | 105.1        | 99.4  | 116.0 | 144.6 | 93.4       | 78.9  | 73.9  | 74.7  |
| C40:0 | 119.2        | 96.6  | 173.6 | 142.0 | 90.8       | 79.7  | 84.4  | 72.3  |
| C40:1 | 143.1        | 135.2 | 135.1 | 139.1 | 113.7      | 103.9 | 109.0 | 104.1 |
| C40:2 | 144.4        | 135.8 | 145.4 | 121.9 | 122.7      | 107.8 | 123.3 | 107.6 |
| C40:3 | 151.0        | 135.8 | 198.1 | 163.8 | 128.4      | 104.8 | 131.7 | 107.9 |
| C40:4 | 133.3        | 137.9 | 171.1 | 184.7 | 112.6      | 97.5  | 95.5  | 99.0  |
| C40:5 | 113.2        | 114.8 | 141.6 | 175.7 | 106.6      | 82.9  | 78.2  | 83.0  |
| C40:6 | 111.5        | 99.4  | 138.2 | 147.4 | 98.0       | 72.8  | 70.2  | 70.9  |
| C42:0 | 101.2        | 112.4 | 137.8 | 123.7 | 110.1      | 108.0 | 71.7  | 83.8  |
| C42:1 | 126.5        | 129.6 | 137.0 | 158.3 | 116.5      | 112.0 | 91.8  | 79.0  |
| C42:2 | 146.8        | 126.1 | 136.8 | 110.7 | 123.1      | 106.3 | 106.3 | 84.2  |
| C42:4 | 144.1        | 141.5 | 134.1 | 134.8 | 122.1      | 104.3 | 95.8  | 100.3 |
| C42:5 | 120.2        | 140.0 | 162.7 | 131.5 | 113.3      | 96.3  | 96.3  | 98.9  |

B)

| Lipid | mitochondria |         | homogenate |         |
|-------|--------------|---------|------------|---------|
|       | Lyso PC      | Lyso PE | Lyso PC    | Lyso PE |
| C16:0 | 138.8        | 137.2   | 112.9      | 114.4   |
| C16:1 | 160.6        | 113.5   | 140.4      | 135.4   |
| C18:0 | 138.5        | 142.4   | 111.7      | 87.5    |
| C18:1 | 131.9        | 136.8   | 116.1      | 125.5   |
| C18:2 | 139.7        | 139.8   | 123.9      | 125.1   |
| C20:0 | 110.2        | 136.5   | 96.5       | 109.4   |
| C20:3 | 152.9        | 115.2   | 143.4      | 159.9   |
| C20:4 | 122.6        | 102.8   | 111.0      | 125.0   |
| C22:6 | 112.1        | 137.4   | 90.7       | 97.0    |

**Supplementary Figure S4: Alterations in lipid homeostasis in mitochondrial fractions of SH-SY5Y APPswedish cells compared to those in homogenates. (A)** Heat map listing the fold changes of the measured PCaa, PCae, PEaa and PEae species in mitochondria compared to homogenate. The lipid classes are arranged that every line contains the same fatty acids. Therefore effects due to the fatty acid composition can be illustrated more clearly. Green color indicates elevating effects and red color reducing effects. **(B)** Heat map listing the fold changes of the measured lyso-PC and lyso-PE species in mitochondria compared to homogenate. Green color indicates elevating effects and red color reducing effects.

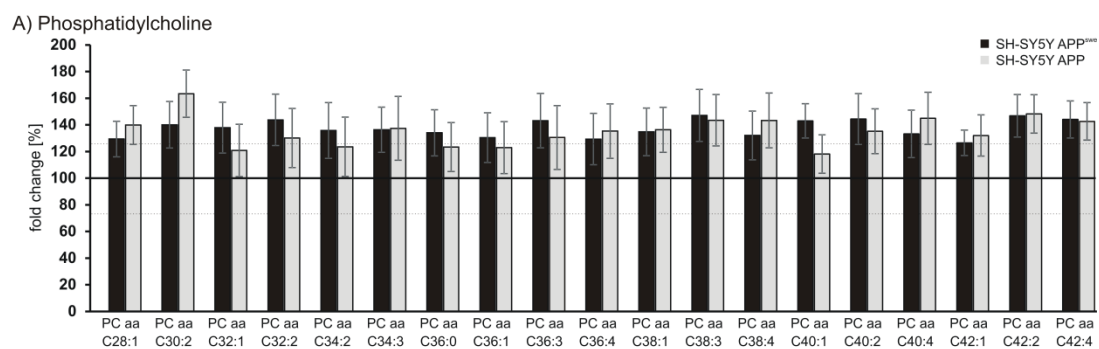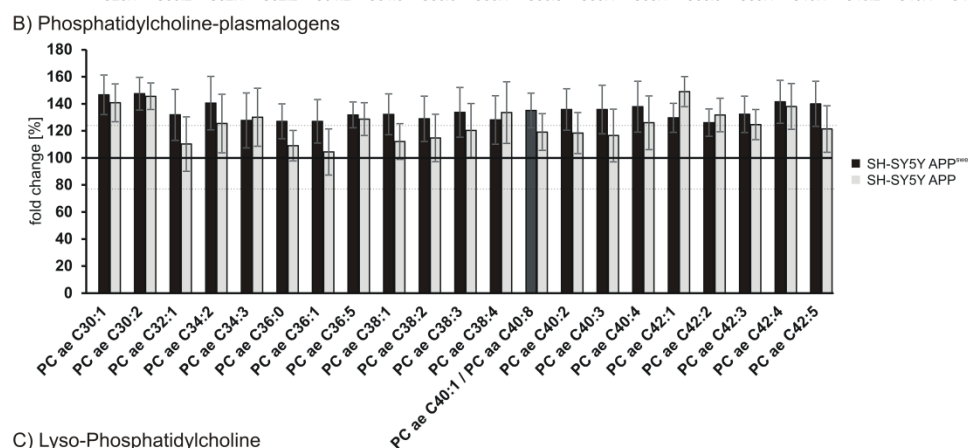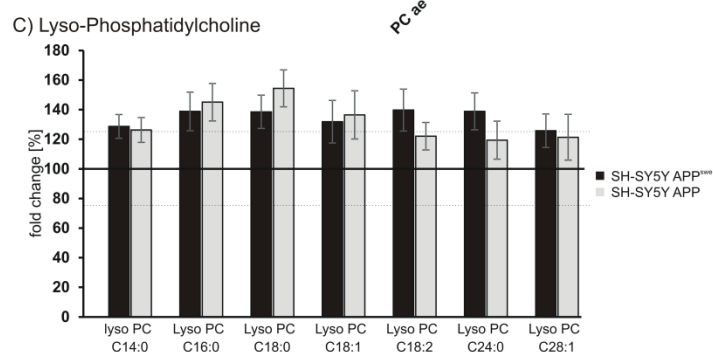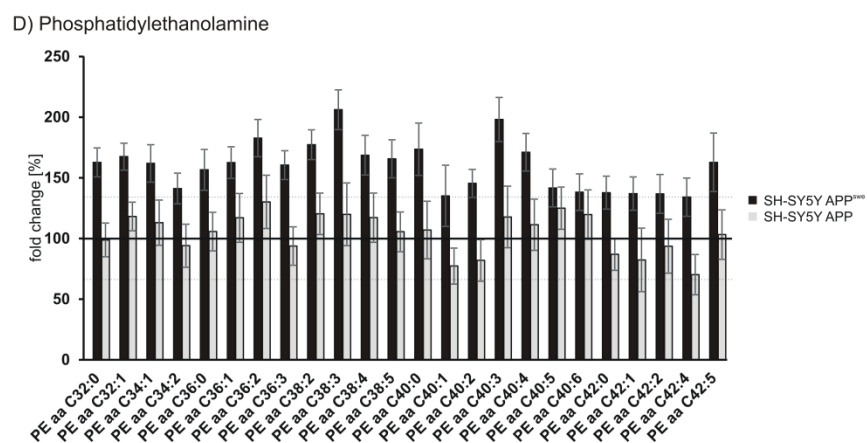

#### E) Phosphatidylethanolamine-Plasmalogens

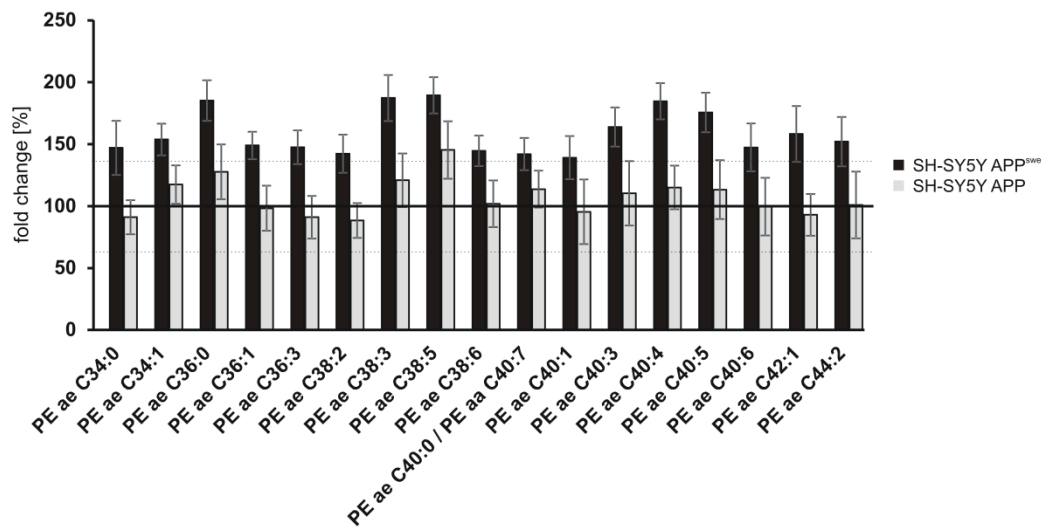

#### F) Lyso-Phosphatidylethanolamines

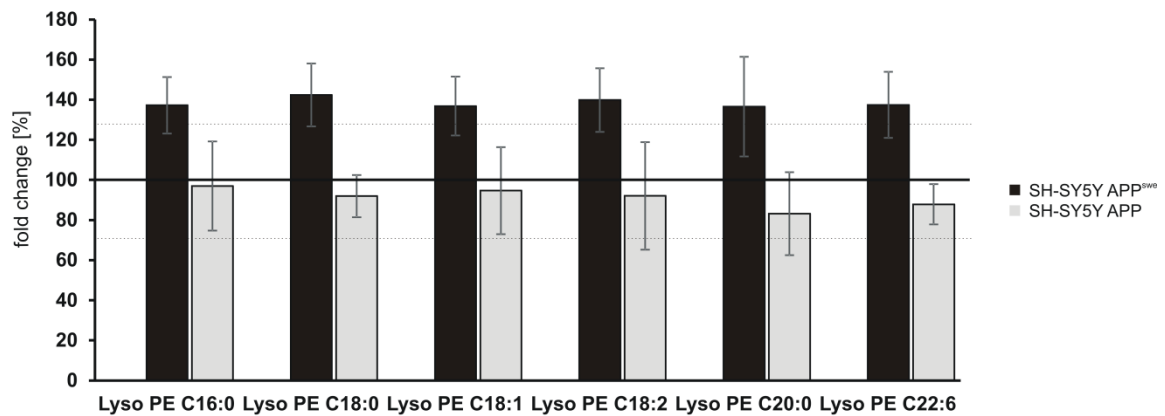

#### G) Carnitine

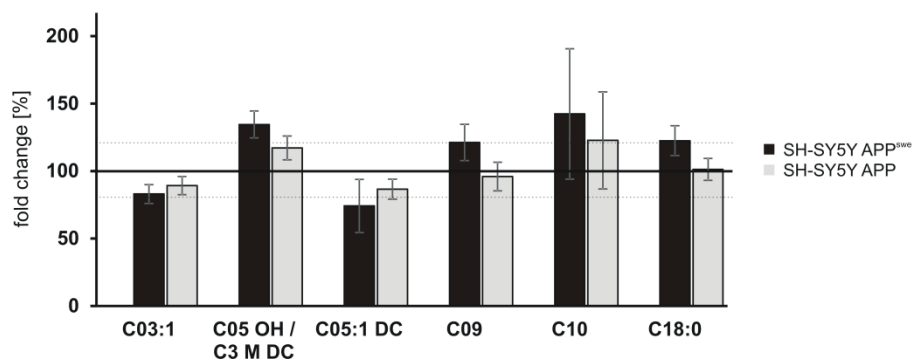

**Supplementary Figure S5: Comparison of lipid changes observed in SH-SY5Y APP<sup>swd</sup> cells to SH-SY5Y APP<sup>w</sup>t overexpressing cells.** The fold changes of those single phosphatidylcholine (A), phosphatidylcholine-plasmalogens (B), lyso-phosphatidylcholine (C), phosphatidylethanolamine (D), phosphatidylethanolamine-plasmalogens (E), lyso-phosphatidylethanolamine (F) and carnitine (G) species that are exclusively changed in mitochondria of APP<sup>swd</sup> overexpressing cells in comparison to SH-SY5Y APP<sup>w</sup>t cells. Changes in SH-SY5Y mock cells were set as 100 % and are marked as the corresponding line in the bar chart. Error bars represent the standard error of the mean (SEM). Average SEM was shown as two grey lines in each diagram, respectively. Statistical significance was calculated using two-tailed student's t-test.

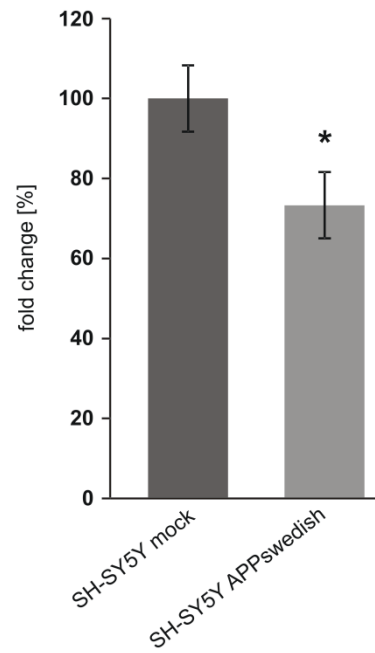

**Supplementary Figure S6: Comparison of cardiolipin levels in SH-SY5Y APPswedish overexpressing cells to SH-SY5Y mock transfected cells.** The levels of cardiolipin were detected using the cardiolipin assay kit from abcam (ab241036). Changes in SH-SY5Y mock cells were set as 100 %. Error bars represent the standard error of the mean (SEM). Statistical significance was calculated using two-tailed student's t-test with \*  $p \leq 0.05$ .

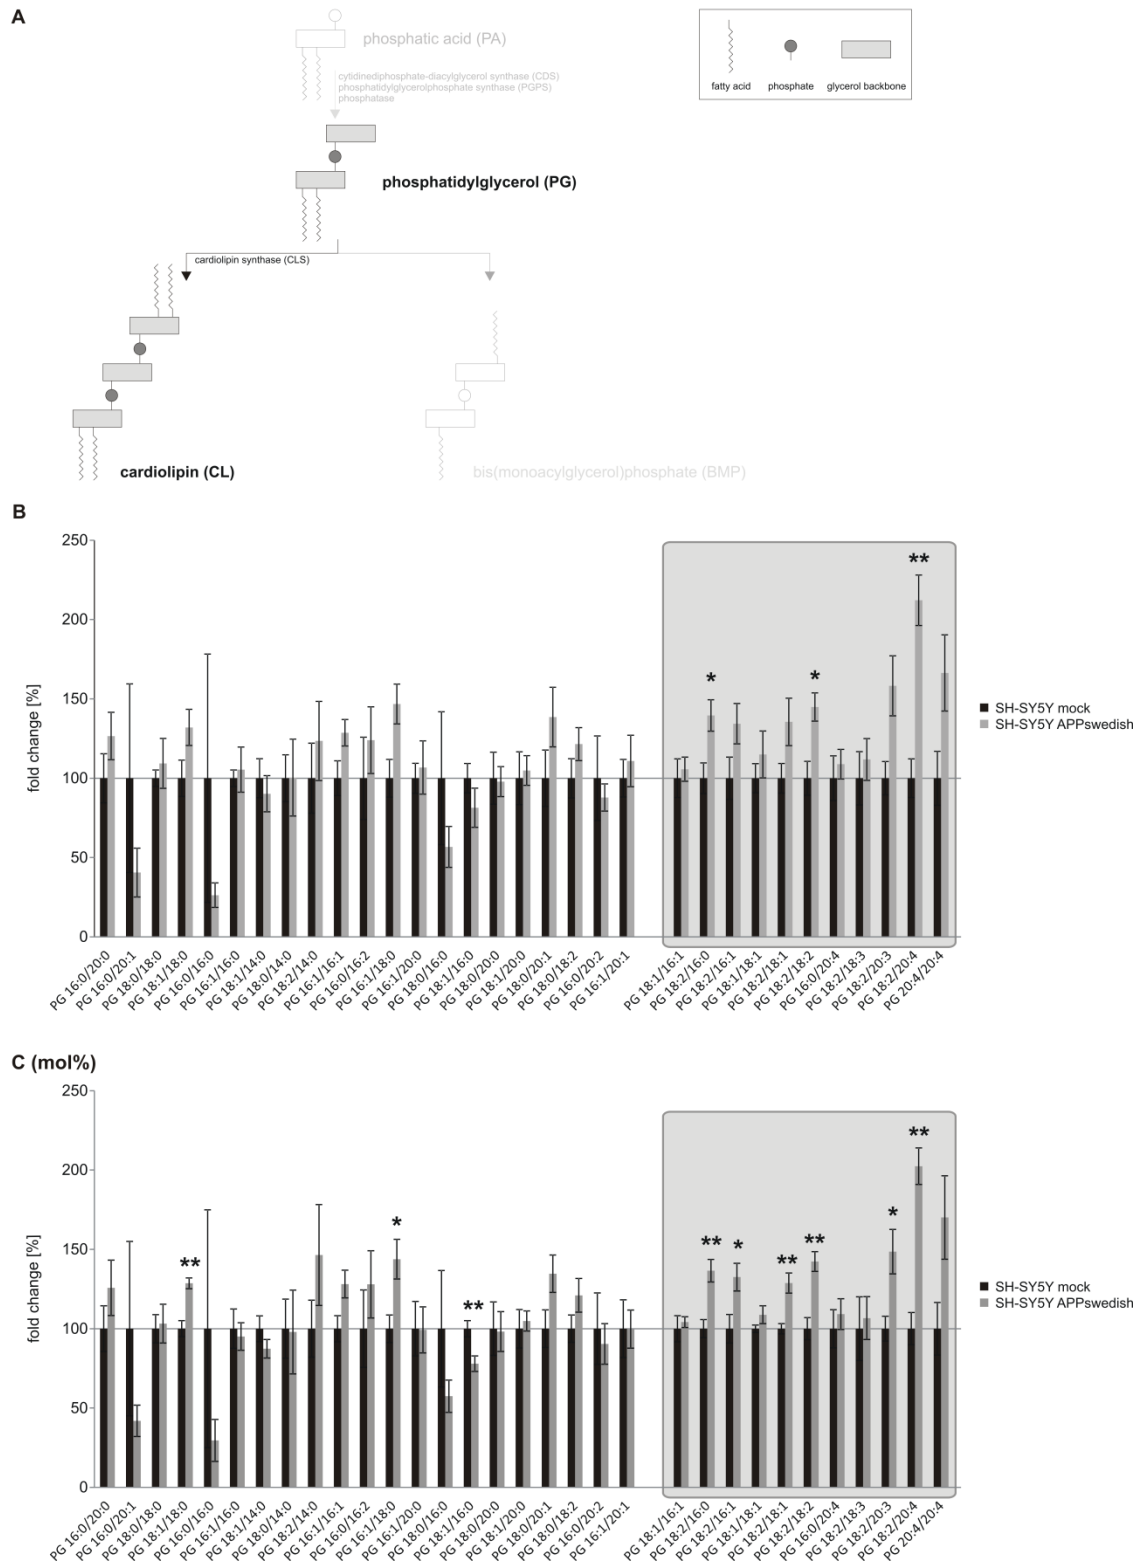

**Supplementary Figure S7: Analysis of phosphatidylglycerol (PG) levels in homogenates of SH-SY5Y APPswedish overexpressing cells in comparison to SH-SY5Y mock transfected cells. (A)** Schematic overview of the cardiolipin synthesis. The cytidinediphosphate-diacylglycerol synthase (CDS) catalyzes the formation of cytidinediphosphate-diacylglycerol (CDP-DAG) by condensation of CTP and phosphatidic acid (PA). The phosphatidylglycerolphosphate synthase (PGPS) converted CDP-DAG to phosphatidylglycerolphosphate (PGP), which is dephosphorylated by a phosphatase resulting in phosphatidylglycerol (PG). Condensation of one molecule PG and CDP-DAG, respectively, by the cardiolipin synthase leads to the formation of cardiolipin. **(B)** The fold changes of single PG

species in homogenates are shown as bar charts. (C) The effects of single PG species independent of PG lipid class effect are presented as bar chart. Changes in SH-SY5Y mock cells were set as 100 %. Error bars represent the standard error of the mean (SEM). Statistical significance was calculated using two-tailed student's t-test with \*  $p \leq 0.05$  and \*\*  $p \leq 0.01$ .



Supplementary table S1: Q1/Q3 masses, declustering potentials (DP) and collision energy (CE) for the analyzed metabolites.

| metabolite | Q1 mass (Da) | Q3 mass (Da) | DP (volts) | CE (volts) |
|------------|--------------|--------------|------------|------------|
| C0         | 162.1        | 85.1         | 61         | 27         |
| C2         | 204.1        | 85.1         | 41         | 27         |
| C3         | 218.1        | 85.1         | 46         | 29         |
| C03 OH     | 234.1        | 85.1         | 53         | 30         |
| C3:1       | 216.1        | 85.1         | 49         | 27         |
| C4         | 232.2        | 85.1         | 46         | 29         |
| C4 OH      | 248.1        | 85.1         | 55         | 32         |
| C4:1       | 230.1        | 85.1         | 52         | 29         |
| C5         | 246.2        | 85.1         | 46         | 29         |
| C5 M DC    | 290.2        | 85.1         | 63         | 37         |
| C5 OH      | 262.2        | 85.1         | 58         | 33         |
| C5:1       | 244.2        | 85.1         | 55         | 31         |
| C5:1 DC    | 274.1        | 85.1         | 60         | 35         |
| C6         | 260.2        | 85.1         | 56         | 27         |
| C6 OH      | 276.2        | 85.1         | 61         | 35         |
| C6:1       | 258.2        | 85.1         | 57         | 33         |
| C7 DC      | 304.2        | 85.1         | 66         | 39         |
| C8         | 288.2        | 85.1         | 66         | 33         |
| C8:1       | 286.2        | 85.1         | 63         | 37         |
| C9         | 302.2        | 85.1         | 66         | 39         |
| C10        | 316.2        | 85.1         | 56         | 37         |
| C10:1      | 314.2        | 85.1         | 68         | 40         |
| C10:2      | 312.2        | 85.1         | 67         | 40         |
| C12        | 344.3        | 85.1         | 73         | 44         |
| C12 DC     | 374.3        | 85.1         | 86         | 45         |
| C12:1      | 342.3        | 85.1         | 73         | 44         |
| C14        | 372.3        | 85.1         | 86         | 45         |
| C14:1      | 370.3        | 85.1         | 78         | 47         |
| C14:1 OH   | 386.3        | 85.1         | 81         | 50         |
| C14:2      | 368.3        | 85.1         | 78         | 47         |
| C14:2 OH   | 384.3        | 85.1         | 81         | 49         |
| C16        | 400.3        | 85.1         | 84         | 51         |
| C16 OH     | 416.3        | 85.1         | 87         | 53         |
| C16:1      | 398.3        | 85.1         | 84         | 51         |
| C16:1 OH   | 414.3        | 85.1         | 87         | 53         |
| C16:2      | 396.3        | 85.1         | 83         | 51         |
| C16:2 OH   | 412.3        | 85.1         | 86         | 53         |
| C18:0      | 428.4        | 85.1         | 96         | 63         |
| C18:1      | 426.4        | 85.1         | 89         | 55         |
| C18:1 OH   | 442.4        | 85.1         | 92         | 57         |
| C18:2      | 424.3        | 85.1         | 89         | 54         |

|                        |       |      |     |    |
|------------------------|-------|------|-----|----|
| <b>Carnitine Std 1</b> | 291.2 | 85.1 | 66  | 33 |
| <b>Carnitine Std 2</b> | 403.3 | 85.1 | 84  | 51 |
| <b>Lyso PC 06:0</b>    | 356.2 | 184  | 72  | 31 |
| <b>Lyso PC 10:0</b>    | 412.3 | 184  | 76  | 30 |
| <b>Lyso PC 12:0</b>    | 440.4 | 184  | 78  | 30 |
| <b>Lyso PC 14:0</b>    | 468.3 | 184  | 79  | 30 |
| <b>Lyso PC 16:0</b>    | 496.3 | 184  | 81  | 31 |
| <b>Lyso PC 16:1</b>    | 494.3 | 184  | 79  | 30 |
| <b>Lyso PC 17:0</b>    | 510.3 | 184  | 82  | 31 |
| <b>Lyso PC 18:0</b>    | 524.3 | 184  | 85  | 31 |
| <b>Lyso PC 18:1</b>    | 522.3 | 184  | 82  | 31 |
| <b>Lyso PC 18:2</b>    | 520.3 | 184  | 82  | 31 |
| <b>Lyso PC 18:3</b>    | 518.4 | 184  | 82  | 31 |
| <b>Lyso PC 20:0</b>    | 552.4 | 184  | 89  | 31 |
| <b>Lyso PC 20:3</b>    | 546.3 | 184  | 87  | 31 |
| <b>Lyso PC 20:4</b>    | 544.3 | 184  | 85  | 31 |
| <b>Lyso PC 20:5</b>    | 542.4 | 184  | 84  | 31 |
| <b>Lyso PC 22:0</b>    | 580.5 | 184  | 93  | 32 |
| <b>Lyso PC 22:6</b>    | 568.4 | 184  | 90  | 32 |
| <b>Lyso PC 24:0</b>    | 608.4 | 184  | 96  | 33 |
| <b>Lyso PC 26:0</b>    | 636.5 | 184  | 101 | 34 |
| <b>Lyso PC 26:1</b>    | 634.4 | 184  | 98  | 33 |
| <b>Lyso PC 28:0</b>    | 664.5 | 184  | 105 | 35 |
| <b>Lyso PC 28:1</b>    | 662.5 | 184  | 103 | 35 |
| <b>Lyso PC Std</b>     | 538.6 | 184  | 96  | 40 |
| <b>PC aa C20:0</b>     | 566.2 | 184  | 94  | 31 |
| <b>PC aa C24:0</b>     | 622.4 | 184  | 98  | 33 |
| <b>PC aa C26:0</b>     | 650.5 | 184  | 103 | 35 |
| <b>PC aa C28:0</b>     | 678.5 | 184  | 106 | 35 |
| <b>PC aa C28:1</b>     | 676.5 | 184  | 106 | 35 |
| <b>PC aa C30:0</b>     | 706.5 | 184  | 114 | 37 |
| <b>PC aa C30:2</b>     | 702.5 | 184  | 111 | 37 |
| <b>PC aa C32:0</b>     | 734.6 | 184  | 119 | 39 |
| <b>PC aa C32:1</b>     | 732.6 | 184  | 118 | 39 |
| <b>PC aa C32:2</b>     | 730.5 | 184  | 117 | 38 |
| <b>PC aa C32:3</b>     | 728.5 | 184  | 117 | 38 |
| <b>PC aa C34:1</b>     | 760.6 | 184  | 125 | 41 |
| <b>PC aa C34:2</b>     | 758.6 | 184  | 123 | 40 |
| <b>PC aa C34:3</b>     | 756.6 | 184  | 123 | 40 |
| <b>PC aa C34:4</b>     | 754.5 | 184  | 122 | 40 |
| <b>PC aa C36:0</b>     | 790.6 | 184  | 131 | 43 |
| <b>PC aa C36:1</b>     | 788.6 | 184  | 131 | 43 |
| <b>PC aa C36:2</b>     | 786.6 | 184  | 130 | 42 |
| <b>PC aa C36:3</b>     | 784.6 | 184  | 130 | 42 |

|             |       |     |     |    |
|-------------|-------|-----|-----|----|
| PC aa C36:4 | 782.6 | 184 | 129 | 42 |
| PC aa C36:5 | 780.6 | 184 | 128 | 42 |
| PC aa C36:6 | 778.5 | 184 | 128 | 42 |
| PC aa C38:0 | 818.7 | 184 | 138 | 45 |
| PC aa C38:1 | 816.7 | 184 | 138 | 45 |
| PC aa C38:3 | 812.6 | 184 | 136 | 44 |
| PC aa C38:4 | 810.6 | 184 | 136 | 44 |
| PC aa C38:5 | 808.6 | 184 | 136 | 44 |
| PC aa C38:6 | 806.6 | 184 | 135 | 44 |
| PC aa C40:0 | 846.7 | 184 | 145 | 47 |
| PC aa C40:1 | 844.7 | 184 | 145 | 47 |
| PC aa C40:2 | 842.7 | 184 | 144 | 47 |
| PC aa C40:3 | 840.7 | 184 | 144 | 47 |
| PC aa C40:4 | 838.6 | 184 | 144 | 47 |
| PC aa C40:5 | 836.6 | 184 | 143 | 47 |
| PC aa C40:6 | 834.6 | 184 | 143 | 46 |
| PC aa C42:0 | 874.7 | 184 | 154 | 50 |
| PC aa C42:1 | 872.7 | 184 | 153 | 50 |
| PC aa C42:2 | 870.7 | 184 | 153 | 50 |
| PC aa C42:4 | 866.7 | 184 | 152 | 50 |
| PC aa C42:5 | 864.7 | 184 | 151 | 49 |
| PC aa C42:6 | 862.6 | 184 | 150 | 49 |
| PC aa C44:0 | 902.7 | 184 | 163 | 50 |
| PC aa C48:0 | 958.8 | 184 | 170 | 50 |
| PC aa Std   | 454.4 | 184 | 76  | 39 |
| PC ae C30:0 | 692.6 | 184 | 111 | 37 |
| PC ae C30:1 | 690.5 | 184 | 109 | 36 |
| PC ae C30:2 | 688.5 | 184 | 108 | 36 |
| PC ae C32:1 | 718.6 | 184 | 115 | 38 |
| PC ae C32:2 | 716.6 | 184 | 114 | 37 |
| PC ae C34:0 | 748.6 | 184 | 122 | 40 |
| PC ae C34:1 | 746.6 | 184 | 121 | 39 |
| PC ae C34:2 | 744.6 | 184 | 120 | 39 |
| PC ae C34:3 | 742.6 | 184 | 120 | 39 |
| PC ae C36:0 | 776.7 | 184 | 128 | 42 |
| PC ae C36:1 | 774.6 | 184 | 127 | 41 |
| PC ae C36:2 | 772.6 | 184 | 127 | 41 |
| PC ae C36:3 | 770.6 | 184 | 126 | 41 |
| PC ae C36:4 | 768.6 | 184 | 126 | 41 |
| PC ae C36:5 | 766.6 | 184 | 125 | 41 |
| PC ae C38:0 | 804.7 | 184 | 135 | 44 |
| PC ae C38:1 | 802.7 | 184 | 134 | 44 |
| PC ae C38:2 | 800.7 | 184 | 133 | 43 |
| PC ae C38:3 | 798.6 | 184 | 133 | 43 |

|              |       |       |     |    |
|--------------|-------|-------|-----|----|
| PC ae C38:4  | 796.6 | 184   | 133 | 43 |
| PC ae C38:5  | 794.6 | 184   | 132 | 43 |
| PC ae C38:6  | 792.6 | 184   | 132 | 43 |
| PC ae C40:0  | 832.7 | 184   | 142 | 46 |
| PC ae C40:1  | 830.7 | 184   | 141 | 46 |
| PC ae C40:2  | 828.7 | 184   | 141 | 46 |
| PC ae C40:3  | 826.7 | 184   | 140 | 46 |
| PC ae C40:4  | 824.7 | 184   | 140 | 45 |
| PC ae C40:5  | 822.6 | 184   | 139 | 45 |
| PC ae C40:6  | 820.6 | 184   | 139 | 45 |
| PC ae C42:0  | 860.8 | 184   | 150 | 49 |
| PC ae C42:1  | 858.7 | 184   | 141 | 46 |
| PC ae C42:2  | 856.7 | 184   | 149 | 48 |
| PC ae C42:3  | 854.7 | 184   | 148 | 48 |
| PC ae C42:4  | 852.7 | 184   | 148 | 48 |
| PC ae C42:5  | 850.7 | 184   | 147 | 48 |
| PC ae C44:3  | 882.7 | 184   | 156 | 51 |
| PC ae C44:4  | 880.7 | 184   | 156 | 51 |
| PC ae C44:5  | 878.7 | 184   | 155 | 51 |
| PC ae C44:6  | 876.7 | 184   | 154 | 50 |
| PC ee Std    | 594.6 | 184   | 74  | 57 |
| Lyso PE 16:1 | 452.3 | 311.2 | 54  | 23 |
| Lyso PE 16:0 | 454.3 | 313.2 | 54  | 23 |
| Lyso PE 18:2 | 478.3 | 337.3 | 54  | 24 |
| Lyso PE 18:1 | 480.3 | 339.3 | 54  | 24 |
| Lyso PE 18:0 | 482.3 | 341.3 | 55  | 24 |
| Lyso PE 20:4 | 502.4 | 361.3 | 55  | 24 |
| Lyso PE 20:3 | 504.4 | 363.2 | 55  | 25 |
| Lyso PE 20:0 | 510.4 | 369.4 | 55  | 25 |
| Lyso PE 22:6 | 526.4 | 385.2 | 56  | 25 |
| PE ae 32:2   | 674.6 | 533.5 | 61  | 27 |
| PE ae 32:1   | 676.6 | 535.5 | 61  | 27 |
| PE aa 32:2   | 688.5 | 547.5 | 64  | 29 |
| PE aa 32:1   | 690.5 | 549.5 | 64  | 29 |
| PE aa 32:0   | 692.5 | 551.5 | 64  | 29 |
| PE ae 34:3   | 700.6 | 559.5 | 64  | 28 |
| PE ae 34:2   | 702.6 | 561.5 | 64  | 28 |
| PE ae 34:1   | 704.7 | 563.6 | 64  | 28 |
| PE ae 34:0   | 706.6 | 565.5 | 64  | 28 |
| PE aa 34:4   | 712.5 | 571.5 | 66  | 30 |
| PE aa 34:3   | 714.5 | 573.5 | 66  | 30 |
| PE aa 34:2   | 716.5 | 575.5 | 66  | 30 |
| PE aa 34:1   | 718.5 | 577.5 | 66  | 30 |
| PE aa 34:0   | 720.5 | 579.5 | 67  | 30 |

|                     |       |       |    |    |
|---------------------|-------|-------|----|----|
| PE ae 36:5          | 724.7 | 583.6 | 66 | 29 |
| PE ae 36:4          | 726.6 | 585.5 | 66 | 29 |
| PE ae 36:3          | 728.6 | 587.6 | 66 | 29 |
| PE ae 36:2          | 730.6 | 589.5 | 67 | 29 |
| PE ae 36:1          | 732.6 | 591.5 | 67 | 29 |
| PE ae 36:0          | 734.6 | 593.5 | 67 | 29 |
| PE aa 36:6          | 736.6 | 595.6 | 68 | 31 |
| PE aa 36:5          | 738.6 | 597.6 | 68 | 31 |
| PE aa 36:4          | 740.6 | 599.6 | 68 | 31 |
| PE aa 36:3          | 742.6 | 601.6 | 68 | 31 |
| PE aa 36:2          | 744.6 | 603.6 | 68 | 31 |
| PE aa 36:1          | 746.6 | 605.6 | 69 | 31 |
| PE aa 36:0          | 748.6 | 607.6 | 69 | 31 |
| PE ae 38:6          | 750.6 | 609.6 | 69 | 30 |
| PE ae 38:5          | 752.6 | 611.6 | 69 | 30 |
| PE ae 38:4          | 754.6 | 613.6 | 69 | 30 |
| PE ae 38:3          | 756.6 | 615.6 | 69 | 30 |
| PE ae 38:2          | 758.6 | 617.6 | 69 | 30 |
| PE ae 38:1          | 760.6 | 619.6 | 70 | 30 |
| PE ae 38:0          | 762.6 | 621.6 | 70 | 30 |
| PE aa 38:6          | 764.6 | 623.6 | 70 | 31 |
| PE aa 38:5          | 766.6 | 625.6 | 70 | 32 |
| PE aa 38:4          | 768.6 | 627.6 | 70 | 32 |
| PE aa 38:3          | 770.6 | 629.6 | 71 | 32 |
| PE aa 38:2          | 772.6 | 631.6 | 71 | 32 |
| PE aa 38:1          | 774.7 | 633.6 | 71 | 32 |
| PE aa 38:0          | 776.7 | 635.6 | 71 | 32 |
| PE ae 40:6          | 778.6 | 637.6 | 72 | 31 |
| PE ae 40:5          | 780.6 | 639.6 | 72 | 31 |
| PE ae 40:4          | 782.6 | 641.6 | 72 | 31 |
| PE ae 40:3          | 784.6 | 643.6 | 72 | 31 |
| PE ae 40:2          | 786.7 | 645.6 | 72 | 31 |
| PE ae 40:1          | 788.7 | 647.6 | 73 | 31 |
| PEae 40:0/PEaa 40:7 | 790.6 | 649.6 | 73 | 31 |
| PE aa 40:6          | 792.6 | 651.6 | 73 | 32 |
| PE aa 40:5          | 794.6 | 653.6 | 73 | 33 |
| PE aa 40:4          | 796.7 | 655.6 | 73 | 33 |
| PE aa 40:3          | 798.6 | 657.6 | 73 | 33 |
| PE aa 40:2          | 800.7 | 659.7 | 73 | 33 |
| PE aa 40:1          | 802.7 | 661.7 | 73 | 33 |
| PE aa 40:0          | 804.6 | 663.6 | 74 | 33 |
| PE ae 42:5          | 808.7 | 667.6 | 75 | 32 |
| PE ae 42:4          | 810.7 | 669.6 | 75 | 32 |
| PE ae 42:3          | 812.7 | 671.6 | 75 | 32 |

|                     |       |       |      |     |
|---------------------|-------|-------|------|-----|
| PE ae 42:2          | 814.7 | 673.6 | 75   | 32  |
| PE ae 42:1          | 816.7 | 675.6 | 76   | 32  |
| PEae 42:0/PEaa 42:7 | 818.7 | 677.6 | 76   | 32  |
| PE aa 42:6          | 820.7 | 679.6 | 75   | 33  |
| PE aa 42:5          | 822.7 | 681.6 | 75   | 34  |
| PE aa 42:4          | 824.7 | 683.6 | 75   | 34  |
| PE aa 42:2          | 828.7 | 687.6 | 76   | 34  |
| PE aa 42:1          | 830.7 | 689.6 | 76   | 34  |
| PE aa 42:0          | 832.7 | 691.6 | 76   | 34  |
| PE ae 44:6          | 834.7 | 693.6 | 78   | 32  |
| PE ae 44:5          | 836.7 | 695.6 | 78   | 33  |
| PE ae 44:4          | 838.7 | 697.6 | 78   | 33  |
| PE ae 44:3          | 840.7 | 699.6 | 78   | 33  |
| PE ae 44:2          | 842.7 | 701.6 | 79   | 33  |
| Std PE aa 16:0      | 468.3 | 327.2 | 53   | 21  |
| PG 16:0/20:0        | 777.6 | 255.2 | -146 | -64 |
| PG 16:0/20:1        | 775.7 | 255.2 | -156 | -55 |
| PG 18:0/18:0        | 777.6 | 283.2 | -146 | -59 |
| PG 18:1/18:0        | 775.7 | 281.1 | -156 | -54 |
| PG 16:0/16:0        | 721.6 | 255.1 | -139 | -50 |
| PG 16:1/16:0        | 719.6 | 253.1 | -133 | -51 |
| PG 18:1/14:0        | 719.6 | 281.1 | -133 | -51 |
| PG 18:0/14:0        | 721.6 | 283.2 | -139 | -49 |
| PG 18:2/14:0        | 719.6 | 279.1 | -133 | -57 |
| PG 16:1/16:1        | 717.6 | 253.1 | -130 | -45 |
| PG 16:0/16:2        | 717.6 | 251.1 | -130 | -46 |
| PG 16:1/18:0        | 747.6 | 253.1 | -145 | -55 |
| PG 16:1/20:0        | 775.7 | 253.1 | -156 | -47 |
| PG 18:0/16:0        | 749.6 | 255.2 | -147 | -56 |
| PG 18:1/16:0        | 747.6 | 281.1 | -145 | -55 |
| PG 18:2/16:0        | 745.6 | 279.1 | -146 | -53 |
| PG 18:1/16:1        | 745.6 | 281.1 | -146 | -54 |
| PG 18:0/20:0        | 805.6 | 283.2 | -148 | -64 |
| PG 18:1/20:0        | 803.6 | 281.1 | -146 | -61 |
| PG 18:0/20:1        | 803.6 | 283.2 | -146 | -66 |
| PG 18:1/18:1        | 773.6 | 281.1 | -149 | -58 |
| PG 18:0/18:2        | 773.6 | 283.1 | -149 | -59 |
| PG 16:0/20:2        | 773.6 | 255.2 | -149 | -56 |
| PG 16:1/20:1        | 773.6 | 253.1 | -149 | -55 |
| PG Std 17:0/14:1    | 705.5 | 269.2 | -160 | -54 |
